# Supplementary material
Source: PubMed Central journal article supplement (PMC3837781)
Supplement: CVI.00320-13_zcd999094860so1.pdf [file CVI.00320-13_zcd999094860so1.pdf]

### Supplementary figures.

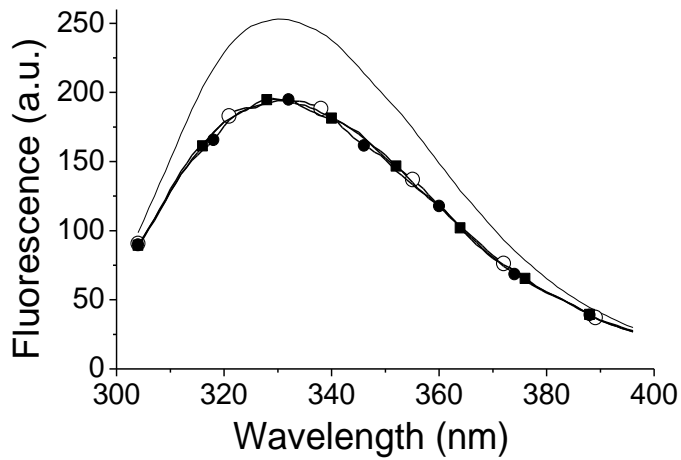

**Supplementary Figure 1:** Tryptophan fluorescence: solid line = rPA without adjuvant; line with empty circle = rPA on Alhydrogel, line with filled circle = rPA on Alhydrogel in 5 mM phosphate; and line with filled square = rPA on Alhydrogel in 10 mM phosphate.

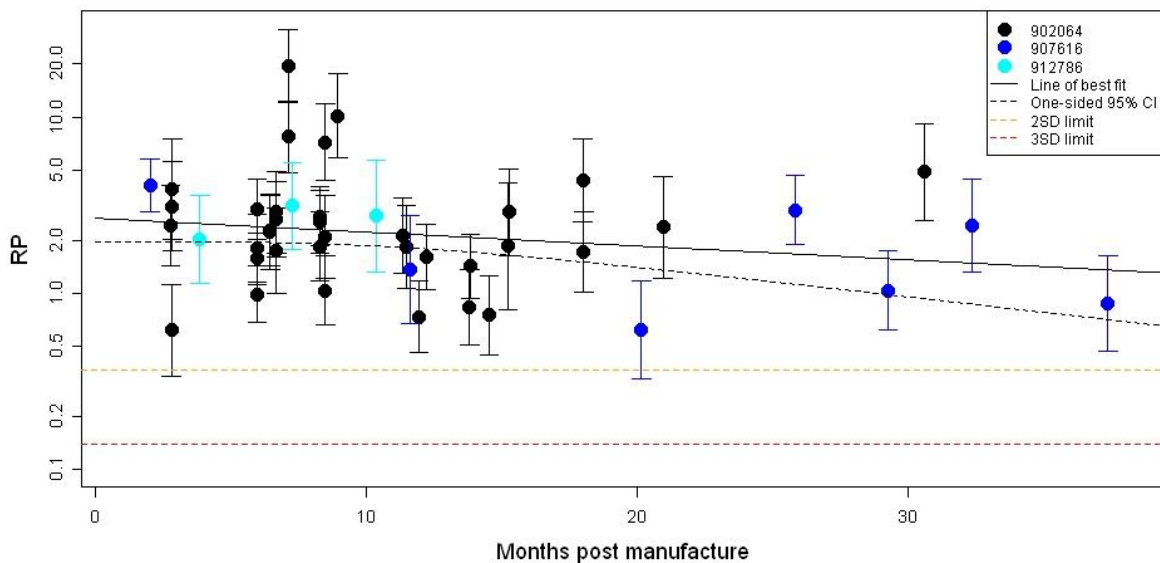

**Supplementary Figure 2:** Stability trending analysis using pooled data from three batches of 4mM phosphate and comparing to a freshly formulated rPA-AIOH standard. Based on the 95% confidence interval crossing a RP limit, the estimate of shelf life for a 2SD RP limit of 0.37 is 53 months. If a stricter RP limit of 0.5 is applied the estimated shelf life is 46 months.
